# Supplementary material
Source: PubMed Central journal article supplement (PMC4367238)
Supplement: Supp_Data.pdf [file Supp_Data.pdf]

## 1 **2. Supplementary Methods**

### 2 ***Preparation of Tat-rMsrA***

3 The cDNA fragment encoding rMsrA was obtained from pcDNA3.1-rMsrA (kindly  
4 provided by Dr. Bertrand Friguet, Universite' Paris 7-Denis Diderot, France) using PCR. A 5'  
5 sense primer containing a BamHI site and a Tat gene code  
6 (5'-AAAGGATCCGGTTACGGTCGTAAGAAACGTAGACAGCGCAGACGTGGTATGCT  
7 CTCCGCCTCCAGAAGGAC-3'), and a 3' reverse complement primer with an XhoI site  
8 (5'-AAACTCGAGTTACTTTTTAATGGCCGTGGGACAGG-3') were used. Both the  
9 pET-32a(+) vector and amplified product were digested with BamHI and XhoI (MBI  
10 FERMENTAS, Burlington, ON, Canada), and the PCR fragment encompassing the complete  
11 rattus MsrA coding region was ligated into the restricted pET-32a (+) vector using phage T4  
12 DNA ligase (MBI Fermentas, Burlington, ON, Canada). The nucleotide sequence of the  
13 cloned insert was confirmed by sequencing at least twice in each direction. BL21 cells were  
14 transformed with the recombinant plasmid and grown in LB medium containing 50 µg / ml  
15 ampicillin at 37 °C. When cells reached an absorbance at 600 nm of 0.7, IPTG (Amresco,  
16 Cochran solon, OH, USA) was added to a final concentration of 0.5 mM and the culture was  
17 continued for an additional 4 h. The cells were centrifuged at 5, 000 g for 10 min at 4 °C and  
18 the pellet was suspended in buffer A (20 mM Tris-HCl, 0.5 mM imidazole and 500 mM NaCl)  
19 and sonicated four times for 30 s. The lysate was centrifuged at 40, 000 g for 30 min at 4 °C.  
20 Supernatant was applied to a 4 ml Ni-Trap nickel-chelating column (qiagen GE Healthcare,  
21 Hilden, Germany) previously equilibrated with the same buffer A. Column was washed with  
22 buffer A containing 60 mM imidazole (Sigma-Aldrich, St. Louis, MO, USA) and the

1 recombinant peptide that contains full sequence of rMsrA was then eluted with buffer A  
2 containing 1 M imidazole. 5 ml of collection was treated with centrifugal ultrafiltration and  
3 the protein was concentrated. The N-terminal His-tag of recombinant peptide was removed  
4 using a Thrombin kit (New England Biolabs, Ipswich, MA, USA). Protein (500 µg) was  
5 digested for 24 h at 20 °C with 2 unit of thrombin. The purity of recombinant peptide was  
6 verified by SDS-PAGE stained with Coomassie Brilliant Blue. Recombinant peptide was  
7 stored at -80 °C until needed. Antibodies against rMsrA were used for immunological  
8 characteristics of recombinant peptide by western blotting analysis. Protein concentrations  
9 were determined by the Bradford method, using bovine serum albumin as a standard.  
10 Heat-inactivated MsrA was prepared by boiling recombinant peptide at 95 °C for 30 min and  
11 no MetO-reducing activity was detected.

12

### 13 *Analysis of Tat-rMsrA activity*

14 Tat-rMsrA activity was monitored by detecting both MetO-reducing activity and methyl  
15 sulfoxides-dependent oxidation of DTT. After preparation, the MsrA activity was controlled  
16 by a measurement of MetO-reducing activity based on the reduction of the substrate MetO to  
17 Met. Recombinant Tat-rMsrA (20 µg) were added into the reaction mixture containing 50  
18 mM sodium phosphate (pH 7.4), 10 mM MgCl<sub>2</sub>, 30 mM KCl, 20 mM DTT (Sigma-Aldrich,  
19 St. Louis, MO, USA) and 0.5 mM MetO (Sigma-Aldrich, St. Louis, MO, USA). The mixture  
20 was incubated for 30 min at 37 °C. The reaction was stopped by addition of diamide. We  
21 monitored the Met content using liquid chromatography coupled with electrospray  
22 ionization-ion trap mass spectrometry (LC-ESI-ITMS). MetO-reducing activity of

1 recombinant peptide was at  $420.2 \pm 22.7$  pmol of the product Met mg protein<sup>-1</sup> min<sup>-1</sup>. After  
2 heat-inactivation, no MetO-reducing activity was detected. Before every experiment, the  
3 activity of recombinant Tat-rMsrA was rapidly monitored by colorimetric determination of  
4 methyl sulfoxides-mediated oxidation of DTT. MsrA-catalyzed oxidation of DTT was  
5 performed in the reaction system (pH 8.0, 200  $\mu$ l) including MgCl<sub>2</sub> 10 mM, KCl 30 mM,  
6 Tris-HCl 25 mM, DMSO 2.5 M, DTT 2.5 mM and MsrA 20  $\mu$ g. Different concentrations of  
7 recombinant rMsrA peptide (active or non-active) were added into the reaction buffer and  
8 incubated for indicated time. Due to the potential reductive activity of DTT, this reaction was  
9 performed in the air-tight and complete darkness. After reaction, 100  $\mu$ l of the reaction  
10 mixture and 100  $\mu$ l DTNB (4 mM) was added to each well and incubated at 37 °C for 10 min.  
11 Absorbance at 412 nm (OD<sub>412</sub>) was measured with a micro-plate reader (ELx800; BioTek,  
12 Winooski, VT, USA). In each group, OD<sub>412</sub> in the wells containing a same system incubated  
13 for 0 min were monitored and defined as initial values. Compared to initial values, the  
14 decreased OD<sub>412</sub> ( $\Delta A$ ) in the wells after reaction were monitored and calculated.  $\Delta A$  in the  
15 wells containing a reaction system with heat-inactivated MsrA peptide were defined as  
16  $\Delta A_{con}$ , which reflected a non-enzymatic oxidation of DTT.  $\Delta A$  in the wells containing a  
17 reaction system with active rMsrA peptide incubated for indicated time were defined as  
18  $\Delta A_{Total}$ , which reflected a total oxidation of DTT. After deduction of non-enzymatic  
19 oxidation of DTT,  $\Delta A$  induced by active MsrA were calculated and defined as:  $\Delta A_{MsrA} =$   
20  $\Delta A_{Total} - \Delta A_{con}$ . Only when the  $\Delta A_{MsrA}$  is above 2.0, the recombinant rMsrA peptide was  
21 used in the experiment.

22

**1 RT-PCR**

2 Total RNA was extracted from microglia using TRIZOL (Invitrogen, Carlsbad, CA, USA),  
3 according to the protocol provided by the manufacturer. The concentration and purity  
4 assessment using a UV-visible spectrophotometer (P360; Implen, Munich, Germany) was  
5 performed at 260 and 280 nm. Single-strand cDNA was synthesized from 2 µg RNA with the  
6 RevertAid™ First Strand cDNA Synthesis system (Transgene, Beijing, China). Primers used  
7 for RT-PCR analysis of MsrA were as follows: MsrA (116 bp)  
8 5'-TGCCAGGACGCACAGAGT-3' (forward), 5'-GAAGCAGCCCATTCCTAAA-3'  
9 (reverse). The first-strand product (2 µl) was used as a template in each 20 µl PCR reactions,  
10 under the following conditions: initial denaturation at 94 °C for 5 min, PCR cycles: 94 °C for  
11 30 s, 57.2 °C for 30 s, 72 °C for 1 min repeated for 40 cycles, final elongation at 72 °C for 5  
12 min. The PCR products were resolved on 2% agarose gel and analyzed by GENIUS  
13 bio-imaging system (Kodak, Rochester, NY, USA). Size markers were obtained from MBI  
14 Fermentas (Burlington, ON, Canada) and used to verify the size of PCR products.

15

**16 Western blotting**

17 After treatments, slices which were carefully separated from the inserts and cells were  
18 lysed in ice-cold lysis buffer (50 mM Tris-HCl, 1 mM EDTA, 100 mM NaCl, 20 mM NaF, 3  
19 mM Na<sub>3</sub>VO<sub>4</sub>, 1 mM phenylmethanesulfonyl fluoride, 1% Nonidet P-40 (v / v), 2.0l g / ml  
20 aprotinin, 2.0l g / ml leupeptin and 2.0l g / ml pepstatin A). Equal amounts of protein from  
21 above lysates were loaded in each lane and separated on 10-15% SDS / PAGE gels. Protein  
22 (20 µg) were separated electrophoretically and then transferred to nitrocellulose membranes

1 by using a transfer cell system (Bio-Rad, California, USA). After blocking with 5% bovine  
2 serum albumin (BSA) / TBS / 0.1% Tween-20 (1 h at room temperature), membranes were  
3 incubated with the following primary antibodies: anti-ED1 at 1:200 dilution (Millipore,  
4 Billerica, MA, USA), anti-iNOS and anti-COX-2 at 1 : 200 dilution  
5 (Santa Cruz Biotechnology, Santa Cruz, USA), anti-MsrA and anti-Iba1 at 1 : 500 dilution  
6 (Abcam, Cambridge, UK), anti-ERK and anti-phosphorylated-ERK at 1 : 1000 dilution  
7 (Santa Cruz Biotechnology, Santa Cruz, USA), anti- $\beta$ -actin at 1 : 2000 dilution (Santa Cruz  
8 Biotechnology, Santa Cruz, USA), anti-p38, anti-phosphorylated-p38, anti-JNK,  
9 anti-phosphorylated-JNK, anti-I $\kappa$ B $\alpha$ , anti-phosphorylated-I $\kappa$ B $\alpha$  and anti-phosphorylated p65  
10 at 1 : 1000 dilution (Cell signaling Technology, Beverly, USA). Appropriate  
11 peroxidase-conjugated secondary antibodies were used to detect the proteins. Immunoblots  
12 were developed on microchemi (DNR, Jerusalem, Israel) by using the enhanced  
13 chemiluminescence technique (ECL, Pierce, Rockford, USA). All assays were performed at  
14 least three times. ImageJ software was used to determine the densitometry of immunoblots  
15 relative to the loading control.

16

### 17 ***Immunolabeling***

18 To prepare brain slices, male SD rats (200-250 g) were deeply anesthetized with sodium  
19 pentobarbital (60 mg / kg) and perfused with warm (37 °C) saline and 4% paraformaldehyde  
20 in 0.1 M phosphate buffer (PB, pH 7.4). Brains were then removed and postfixed in 4%  
21 paraformaldehyde for at least 24 h. Following transfer to 30% sucrose solution overnight at 4  
22 °C, the brains were chipped into coronal sections (25  $\mu$ m thickness) with a freezing

1 microtome (CM1900; Leica Microsystems, Wetzlar, Germany). For cultured microglia, cells  
2 were fixed with 4% paraformaldehyde in 0.01 M phosphate-buffered saline (PBS, pH 7.4) for  
3 30 min and then rinsed three times with PBS for 10 min each.

4 Then, the slices or cells were then permeabilized with PBS containing 0.3% Triton X-100  
5 for 30 min and blocked by 3% BSA-PBS for 30 min at room temperature. The slices or cells  
6 were probed with appropriate antibodies against p65, MsrA and / or Iba1 at 1 : 100 dilution  
7 (Santa Cruz Biotechnology, Santa Cruz, USA) in PBS containing 0.3% TritonX-100 and 1%  
8 BSA overnight at 4 °C. Slices were rinsed in PBS three times for 10 min each, and then  
9 incubated with donkey anti-rabbit fluorescein isothiocyanate (FITC)-conjugated second  
10 antibody and / or donkey anti-goat CY3-labeled second antibody at 1 : 200 dilution (Pierce,  
11 Rockford, USA) in PBS containing 0.3% TritonX-100 and 1% BSA for 1 h at room  
12 temperature. After washed three times in PBS, slices were mounted on glass slides with 30%  
13 glycerin and imaged using a fluorescence microscope (System Microscopy IX70; Olympus,  
14 Tokyo, Japan) or a confocal laser scanning microscope (FV500; Olympus, Tokyo, Japan).

15

### 16 ***Measurements of intracellular ROS***

17 The levels of intracellular ROS were determined by the 2', 7'-dichlorodihydrofluorescein  
18 diacetate (H<sub>2</sub>DCFDA) assay (47). H<sub>2</sub>DCFDA diffuses through the cell membrane and is  
19 deacetylated by intracellular esterase to non-fluorescent 2', 7'-dichlorodihydrofluorescein  
20 (DCFH). DCFH reacts with ROS to form 2', 7'-dichlorofluorescein (DCF), the fluorescent  
21 product. In brief, primary microglial cells were seeded in a 96-well plate and loaded with  
22 H<sub>2</sub>DCFDA (20 μM, Sigma-Aldrich, St. Louis, USA) for 1 h, followed by pretreatment with

1 Tat-rMsrA or non-active Tat-rMsrA (0.5  $\mu$ M) for 1 h, and then treatment with LPS (100 ng /  
2 ml) (Sigma-Aldrich, St. Louis, USA). After incubation at 37 °C for 30 min, the fluorescence  
3 images were immediately taken using a fluorescence microscope (System Microscopy IX70;  
4 Olympus, Tokyo, Japan). DCF intensities of cells were counted using Image-Pro Plus (IPP)  
5 software.

6

### 7 ***Superoxide assay***

8 The amounts of extracellular superoxide was determined by measuring the superoxide  
9 dismutase (SOD)-inhibitable reduction of the tetrazolium salt WST-1. Briefly, primary  
10 microglia-enriched cultures in the 96-well plate were washed twice with phosphate-buffered  
11 saline (PBS). Cells were then incubated at 37 °C for 1 h with vehicle control or Tat-rMsrA /  
12 non-active Tat-rMsrA (0.5  $\mu$ M) in PBS (50  $\mu$ l / well). Thereafter, 50  $\mu$ l of PBS with and  
13 without SOD (50 U / ml, Sigma-Aldrich, St. Louis, USA) was added to each well along with  
14 50  $\mu$ l of WST-1 (1 mM, Sigma-Aldrich, St. Louis, USA) in PBS and 50  $\mu$ l of vehicle or LPS  
15 (100 ng / ml). Thirty minutes later, absorbance at 450 nm was read with a micro-plate reader  
16 (Sunrise A-5082; Tecan, Salzburg, Australia). The different absorbance observed in the  
17 presence and absence of SOD was considered to be the production of produced superoxide.

18

### 19 ***Luminol-enhanced chemiluminescence assay***

20 Hydroxyl radical was generated by the addition of ferrous iron to the buffer solution.  
21 Freshly prepared FeSO<sub>4</sub> (0.5 mM) was injected to NaHCO<sub>3</sub> / Na<sub>2</sub>CO<sub>3</sub> buffer (50 mM  
22 NaHCO<sub>3</sub> and 50 mM Na<sub>2</sub>CO<sub>3</sub>, pH 10.2) plus luminol (0.1 mM) mixture. Luminol

1 chemiluminescence was measured at 25 °C using a chemiluminometer (Lumat LB9507;  
2 EG&G BERTHOLD, Bad Wildbad, Germany). The effects of various concentrations of  
3 methionine (0.1, 1 and 10 mM) in the presence or absence of Tat-rMsrA / non-active  
4 Tat-rMsrA (1 µM) were examined prior to addition of the stimulant, FeSO<sub>4</sub>. Duplicate assays  
5 were performed in all experiments.

6

### 7 ***Methionine sulfoxide assay***

8 Microglial cells were lysed in ice-cold lysis buffer (50 mM Tris-HCl, 1 mM EDTA, 100  
9 mM NaCl, 20 mM NaF, 3 mM Na<sub>3</sub>VO<sub>4</sub>, 1 mM phenylmethanesulfonyl fluoride, 1% Nonidet  
10 P-40 (v / v), 2.0l g / ml aprotinin, 2.0l g / ml leupeptin and 2.0l g / ml pepstatin A). The  
11 lysates were recovered by centrifugation at 12, 000 g for 15 min. After denaturation, equal  
12 amounts of lysates were treated with 0.5 mM H<sub>2</sub>O<sub>2</sub> in the presence of Tat-rMsrA or  
13 non-active Tat-rMsrA (1 µM) for 40 min at 37 °C. Then the lysates were boiled in sample  
14 buffer without reducing agent at 95 °C for 5 min, and detection of methionine sulfoxide was  
15 performed with the methionine sulfoxide immunoblotting kit (Cayman, Ann Arbor, MI, USA)  
16 according to the manufacturer's protocol.

17

### 18 ***Rat model of acute neuroinflammation***

19 LPS was injected into the dentate gyrus of hippocampus to evoke neuroinflammation in  
20 rats. All experiments were carried out on SD rats (200-250 g). Two stainless-steel guide  
21 cannulas (22 gauge) were bilaterally implanted using a stereotactic holder under aseptic  
22 conditions. Each double-guide cannula with inserted dummy cannula and dust cap was fixed



1 to the skull with dental cement. Bilateral cannula were delivered into the dentate gyrus of the  
2 hippocampal formation at the stereotaxic coordinates, relatives to the bregma, as follows: 2.2  
3 mm lateral, 3.7 mm posterior and 3.8 mm ventral from top of the skull. The animals were  
4 allowed to recover for 7 d before the experiments started. On the day of the experiment,  
5 sterilized physiological saline (2  $\mu$ l) or Tat-rMsrA / non-active Tat-rMsrA (2  $\mu$ l, 3 mg / ml)  
6 was infused at a constant rate of 1  $\mu$ l / min through a stainless steel cannula of outside tip  
7 diameter 0.28 mm, connected to a 5  $\mu$ l microsyringe. The cannula was maintained in place  
8 for 5 min to limit reflux along the injection track. At day 2 post injection, rats were injected  
9 with 2  $\mu$ l sterilized physiological saline or LPS (5 mg / ml, dissolved in 2  $\mu$ l of sterilized  
10 physiological saline) into the dentate gyrus of hippocampus for 24 h. Then, brains were  
11 extracted and processed for immunohistochemistry and immunoblotting.
