# Supplementary material
Source: PubMed Central journal article supplement (PMC4367238)
Supplement: Supp_Figure1.pdf [file Supp_Figure1.pdf]

1 **Supplementary Information**2 **1. Supplementary Figures**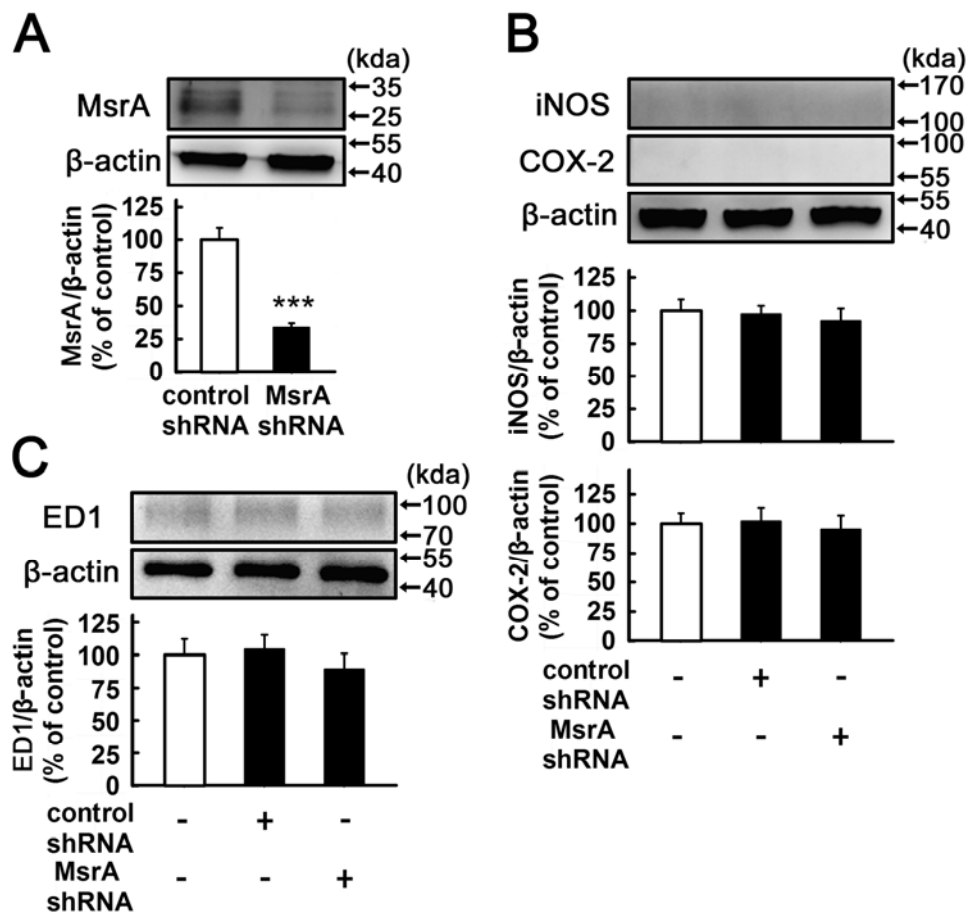

3

4 **FIG. S1. MsrA shRNA significantly inhibits the expression of MsrA in microglia and has**5 **no perceptible effect on microglial iNOS, COX-2 and ED1 expression.** Primary microglial6 cells were transfected with control shRNA or MsrA shRNA for 72 h. **(A)** The expression of

7 MsrA was detected and expressed as a relative change in comparison with the control shRNA

8 treatment, which was set to 100% (n = 4). **(B & C)** The expression of (B) iNOS, COX-2 and

9 (C) ED1 was detected and expressed as a relative change in comparison with the untreated

10 cells, which was set to 100% (n = 4). Data are expressed as mean  $\pm$  SEM, \*\*\*  $p < 0.001$  vs

11 control shRNA.
