# Supplementary material
Source: PubMed Central journal article supplement (PMC4367238)
Supplement: Supp_Figure2.pdf [file Supp_Figure2.pdf]

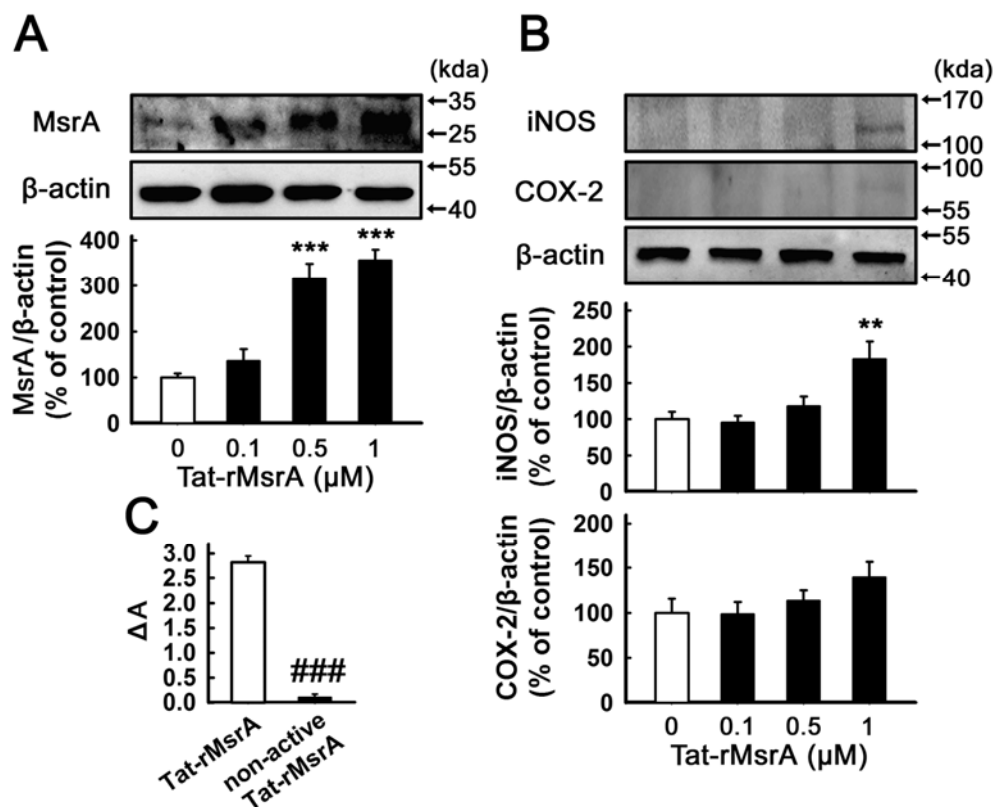

1

2 **FIG. S2. The effects of Tat-rMsrA on the intracellular MsrA levels and microglial**3 **activity state. (A)** Primary microglial cells were incubated with different concentrations of4 Tat-rMsrA (0.1, 0.5 or 1  $\mu$ M) for 1 h. The expression of MsrA was detected and expressed as5 a relative change in comparison with the untreated cells, which was set to 100% (n = 4). **(B)**

6 Primary microglial cells were incubated with different concentrations of Tat-rMsrA (0.1, 0.5

7 or 1  $\mu$ M) for 24 h. The expression of iNOS and COX-2 was detected and expressed as a8 relative change in comparison with the untreated cells, which was set to 100% (n = 4). **(C)**

9 MsrA activity of Tat-rMsrA and non-active Tat-rMsrA was compared by using a colorimetric

10 method (n = 4). The non-active Tat-rMsrA was prepared by boiling Tat-rMsrA at 95  $^{\circ}$ C for 3011 min. Data are expressed as mean  $\pm$  SEM, \*\*  $p$  < 0.01, \*\*\*  $p$  < 0.001 vs untreated cells, ####  $p$  <

12 0.001 vs Tat-rMsrA.

13
