# Supplementary material
Source: PubMed Central journal article supplement (PMC4367238)
Supplement: Supp_Figure3.pdf [file Supp_Figure3.pdf]

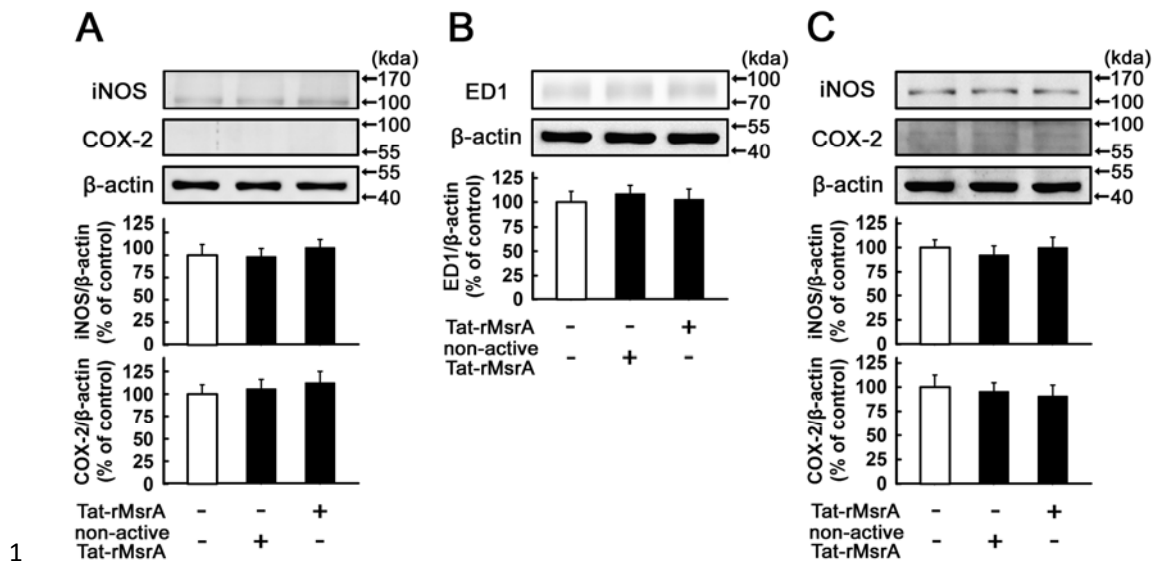

1  
2 **FIG. S3. Neither Tat-rMsrA nor non-active Tat-rMsrA alone has a perceptible effect on**  
3 **microglial iNOS, COX-2 and ED1 expression *in vitro* and *in vivo*.** (A & B) Primary  
4 microglial cells were treated with Tat-rMsrA or non-active Tat-MsrA (0.5  $\mu$ M) for 25 h (n =  
5 5). The levels of (A) iNOS, COX-2 and (B) ED1 were evaluated by western blotting assay.  
6 (C) SD rats were injected with Tat-rMsrA or non-active Tat-rMsrA (2  $\mu$ l, 3 mg / ml) into the  
7 dentate gyrus of hippocampus for 48 h (n = 6). The levels of iNOS and COX-2 were  
8 evaluated by western blotting assay. Results were expressed as a relative change in  
9 comparison with the untreated cells or slices, which was set to 100%. Data are expressed as  
10 mean  $\pm$  SEM.
