# Supplementary material
Source: PubMed Central journal article supplement (PMC4367238)
Supplement: Supp_Figure4.pdf [file Supp_Figure4.pdf]

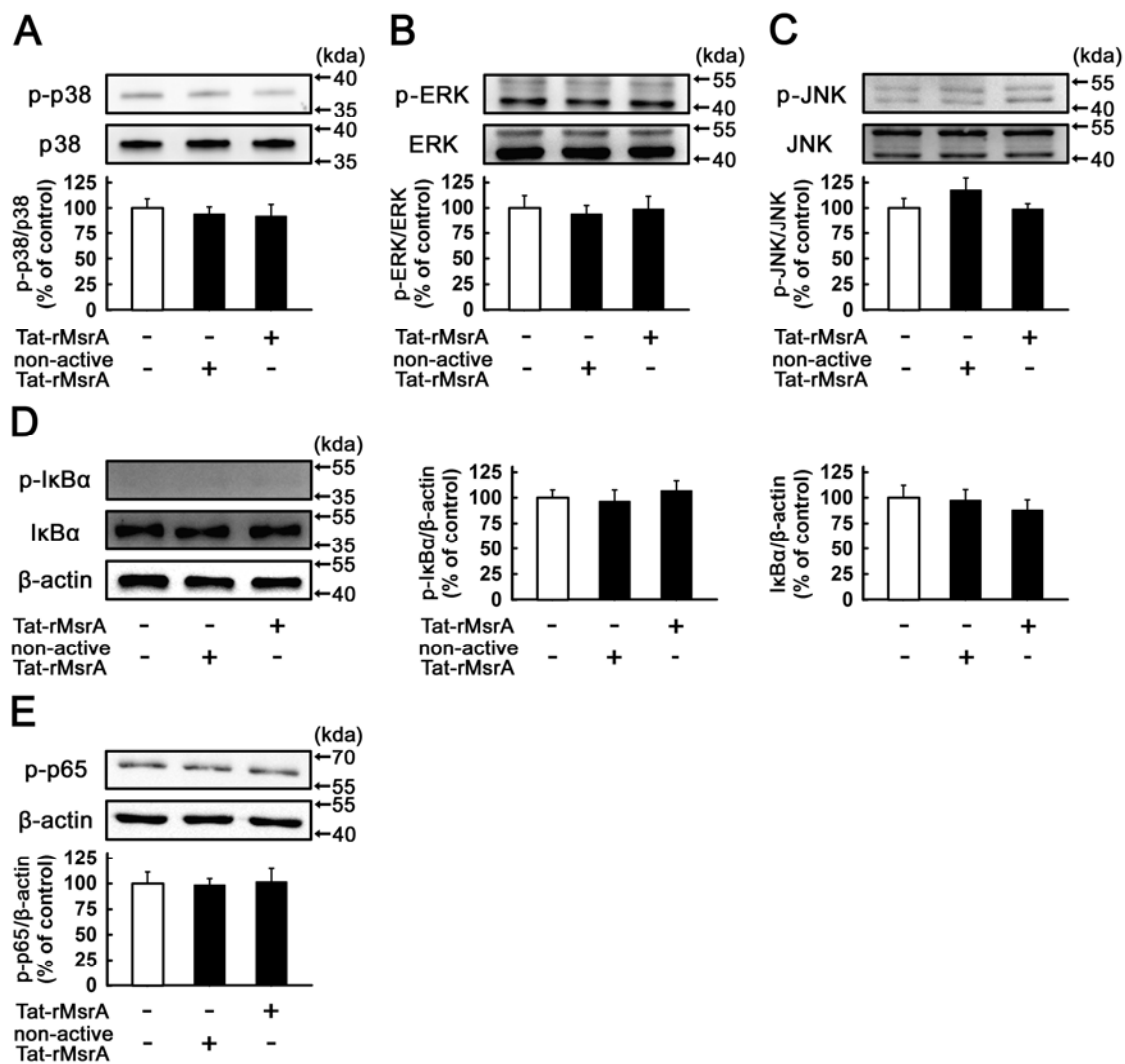

1  
2 **FIG. S4. Neither Tat-rMsrA nor non-active Tat-rMsrA alone has a perceptible effect on**  
3 **the activation of MAPKs and NF- $\kappa$ B signaling pathways.** (A-C) Primary microglial cells  
4 were incubated with Tat-rMsrA or non-active Tat-rMsrA (0.5  $\mu$ M) for 90 min. Total lysates  
5 were obtained and the phosphorylation of (A) p38 (n = 4), (B) ERK (n = 5) and (C) JNK (n =  
6 3) was analyzed by western blotting. (D & E) Primary microglia enriched cultures were  
7 treated with Tat-rMsrA or non-active Tat-rMsrA (0.5  $\mu$ M) for 65 min. The whole-cell lysates  
8 were obtained and the phosphorylation of (D) I $\kappa$ B $\alpha$  and (E) p65 was analyzed by western  
9 blotting assay (n = 5). Results were expressed as a relative change in comparison with the  
10 untreated cells, which was set to 100%. Data are expressed as mean  $\pm$  SEM.
