# Supplementary material
Source: PubMed Central journal article supplement (PMC4367238)
Supplement: Supp_Figure5.pdf [file Supp_Figure5.pdf]

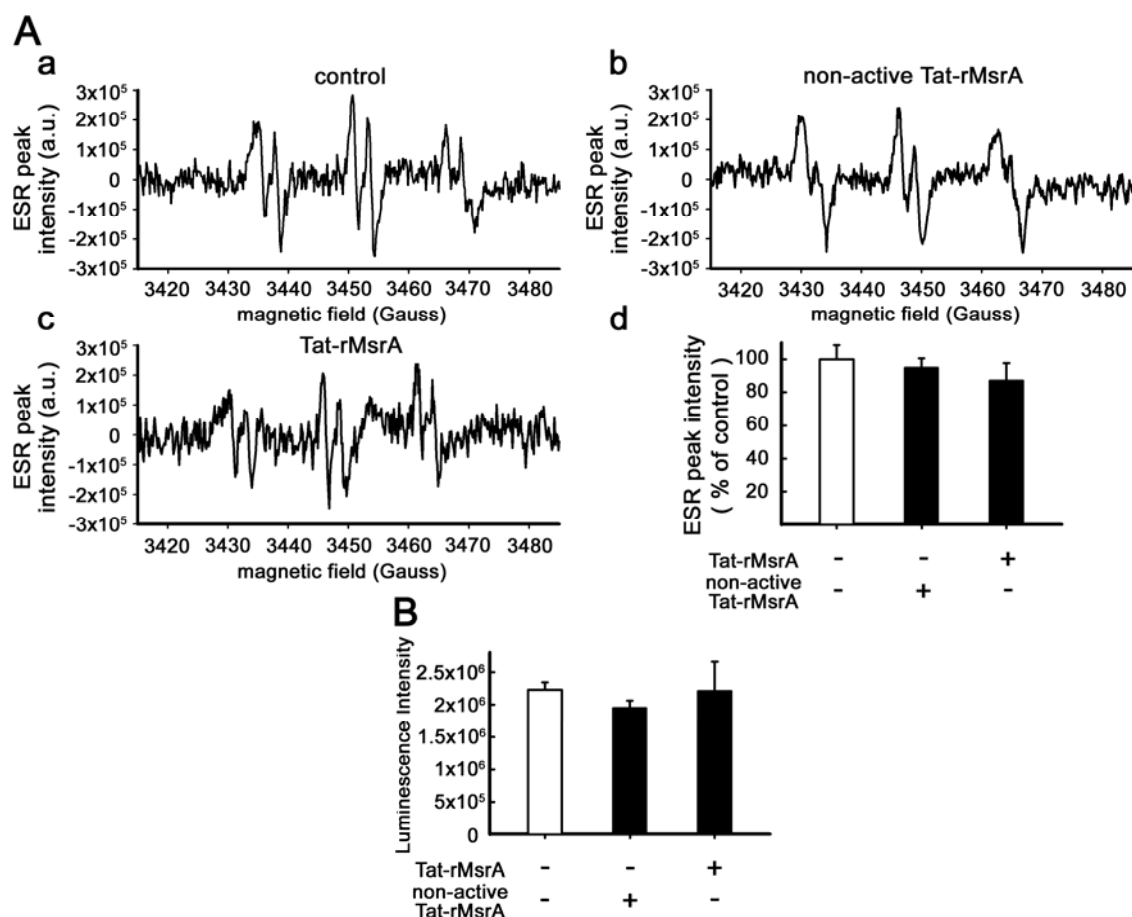

1  
 2 **FIG. S5. Neither Tat-rMsrA nor non-active Tat-rMsrA alone has perceptible effects on**  
 3 **ESR signals and luminescence intensity in Fenton system. (A)** ESR spectra of the spin  
 4 adduct of OH• radical observed during the reaction of 0.5 mM H<sub>2</sub>O<sub>2</sub> containing 30 mM PBN  
 5 and 0.2 mM FeSO<sub>4</sub> with Tat-rMsrA or non-active Tat-rMsrA (n = 5). (a) Control, containing  
 6 H<sub>2</sub>O<sub>2</sub>, FeSO<sub>4</sub> and PBS; (b) As in (a) in the presence of non-active Tat-rMsrA (1 μM); (c) As  
 7 in (a) in the presence of Tat-rMsrA (1 μM); (d) The levels of ESR peak intensity were  
 8 expressed as a relative change in comparison with the untreated control, which was set to  
 9 100%. **(B)** The effect of Tat-rMsrA or non-active Tat-rMsrA (1 μM) alone on  
 10 luminol-enhanced chemiluminescence was assessed (n = 4). Data are expressed as mean ±  
 11 SEM.

12
